# Supplementary material for: Theoretical open-loop model of respiratory mechanics in the extremely preterm infant
Source: PubMed Central journal article supplement (PMC6002107; doi:10.1371/journal.pone.0198425), 2018-06-14
Supplement: pone.0198425.s001.pdf [file pone.0198425.s001.pdf]

## S1 Appendix

We analyze the inherent stability of the model under constant non-oscillatory muscle pressure by examining the eigenvalues of the Jacobian at the nominal parameter set and varying parameters by multiples of 2 and 10. To obtain steady-states,  $P_{mus}$  is set at a constant called  $P_{mus,C}$  and the system of ODE's is set to equal 0:

$$\begin{aligned} 0 &= \frac{1}{I_u} (P_{ao} - P_u - R_u \dot{V}) \\ 0 &= \dot{V} - \dot{V}_A \\ 0 &= \frac{\dot{V}_A}{C_A} \\ 0 &= \frac{\dot{V}_A - (P_{ve}/R_{ve})}{C_{ve}} \end{aligned}$$

It follows that  $\dot{V} = \dot{V}_C = \dot{V}_A = 0$  and  $P_u = P_{ve} = P_c = P_A = 0$ . Given the relations  $P_{el} = f(V_A)$ ,  $P_{tm} = f(V_c)$ , and  $P_{cw} = f(V_{cw})$ , we have 3 equations with 6 unknowns ( $V_A, V_c, V_{cw}, P_{el}, P_{tm}, P_{cw}$ ). Three additional equations come from incorporating loop summations such that  $P_{el}(V_A) = P_{tm}(V_c)$ ,  $P_{tm} = -(P_{cw} + P_{mus,C})$ , and  $V = V_{cw} = V_A + V_c$ . Noting that  $P_{el}$  is defined implicitly by Eq. (10) and using the compliance curve functions

$$\begin{aligned} P_{cw} &= c_w + d_w \ln \left( e^{(V_A + V_c - a_w)/b_w} - 1 \right) \\ P_{tm} &= c_c - d_c \ln \left( \frac{V_{c,max}}{V_c} - 1 \right) \end{aligned}$$

we obtain two equations

$$\begin{aligned} 0 &= P_{cw}(V_A(P_{el}), V_c) + P_{mus,C} + P_{tm}(V_c) \\ 0 &= P_{cw}(V_A(P_{el}), V_c) + P_{mus,C} + P_{el} \end{aligned}$$

that are solved numerically for two unknowns  $P_{el}, V_c$  for each modified parameter set using an iterative algorithm.  $P_{el}$  From these steady-state values we can calculate the remaining state variables.

In order to linearize the system and determine asymptotic behavior we rewrite the system in terms of the state variables  $\dot{V}, V_c, P_{el}, P_{ve}$  using previously described relationships:

$$\begin{aligned} \dot{V} &= \frac{1}{I_u} (P_{ao} - R_c(V_c)\dot{V} - P_{tm}(V_c) - P_{cw}(V_A(P_{el}) + V_c) - P_{mus} - R_u(\dot{V})\dot{V}) \\ \dot{V}_c &= \dot{V} - \frac{P_{tm}(V_c) - P_{el} - P_{ve}}{R_s(V_A(P_{el}))} \\ \dot{P}_{el} &= \frac{1}{C_A(P_{el})} \left[ \frac{P_{tm}(V_c) - P_{el} - P_{ve}}{R_s(V_A(P_{el}))} \right] \\ \dot{P}_{ve} &= \frac{1}{C_{ve}} \left[ \frac{P_{tm}(V_c) - P_{el} - P_{ve}}{R_s(V_A(P_{el}))} - \frac{P_{ve}}{R_{ve}} \right] \end{aligned}$$

where the quantity  $\frac{P_{tm}(V_c) - P_{el} - P_{ve}}{R_s(V_A(P_{el}))} = \dot{V}_A$ . The Jacobian

$$J = \begin{bmatrix} \frac{\partial \dot{V}}{\partial \dot{V}} & \frac{\partial \dot{V}}{\partial V_c} & \frac{\partial \dot{V}}{\partial P_{el}} & \frac{\partial \dot{V}}{\partial P_{ve}} \\ \frac{\partial \dot{V}_c}{\partial \dot{V}} & \frac{\partial \dot{V}_c}{\partial V_c} & \frac{\partial \dot{V}_c}{\partial P_{el}} & \frac{\partial \dot{V}_c}{\partial P_{ve}} \\ \frac{\partial \dot{P}_{el}}{\partial \dot{V}} & \frac{\partial \dot{P}_{el}}{\partial V_c} & \frac{\partial \dot{P}_{el}}{\partial P_{el}} & \frac{\partial \dot{P}_{el}}{\partial P_{ve}} \\ \frac{\partial \dot{P}_{ve}}{\partial \dot{V}} & \frac{\partial \dot{P}_{ve}}{\partial V_c} & \frac{\partial \dot{P}_{ve}}{\partial P_{el}} & \frac{\partial \dot{P}_{ve}}{\partial P_{ve}} \end{bmatrix}$$

was found using symbolic computation then used numerically to calculate eigenvalues. All parameter variations gave stable solutions except  $c_c$ ,  $d_c$ , and  $V_{c,max}$ . However, varying these parameters by 2 and 10 is not actually physiological and the instability comes from these modifications making the parameter values inconsistent with the rest of the system. The parameters  $c_c$  and  $d_c$  must be equal with our calculations, and since  $c_c$  is a normal operating pressure, it must stay within a narrow range. Likewise,  $V_{c,max}$  is equivalent to dead space so not only must it also be within a narrow range but if it varies too much with respect to other parameters and states then the equations will be inconsistent. It is therefore reasonable to state that the steady-state of this model system is inherently stable for the physiological parameter ranges used here.
